# Supplementary material
Source: PubMed Central journal article supplement (PMC6878985)
Supplement: NIHMS1543849-supplement-1.pdf [file NIHMS1543849-supplement-1.pdf]

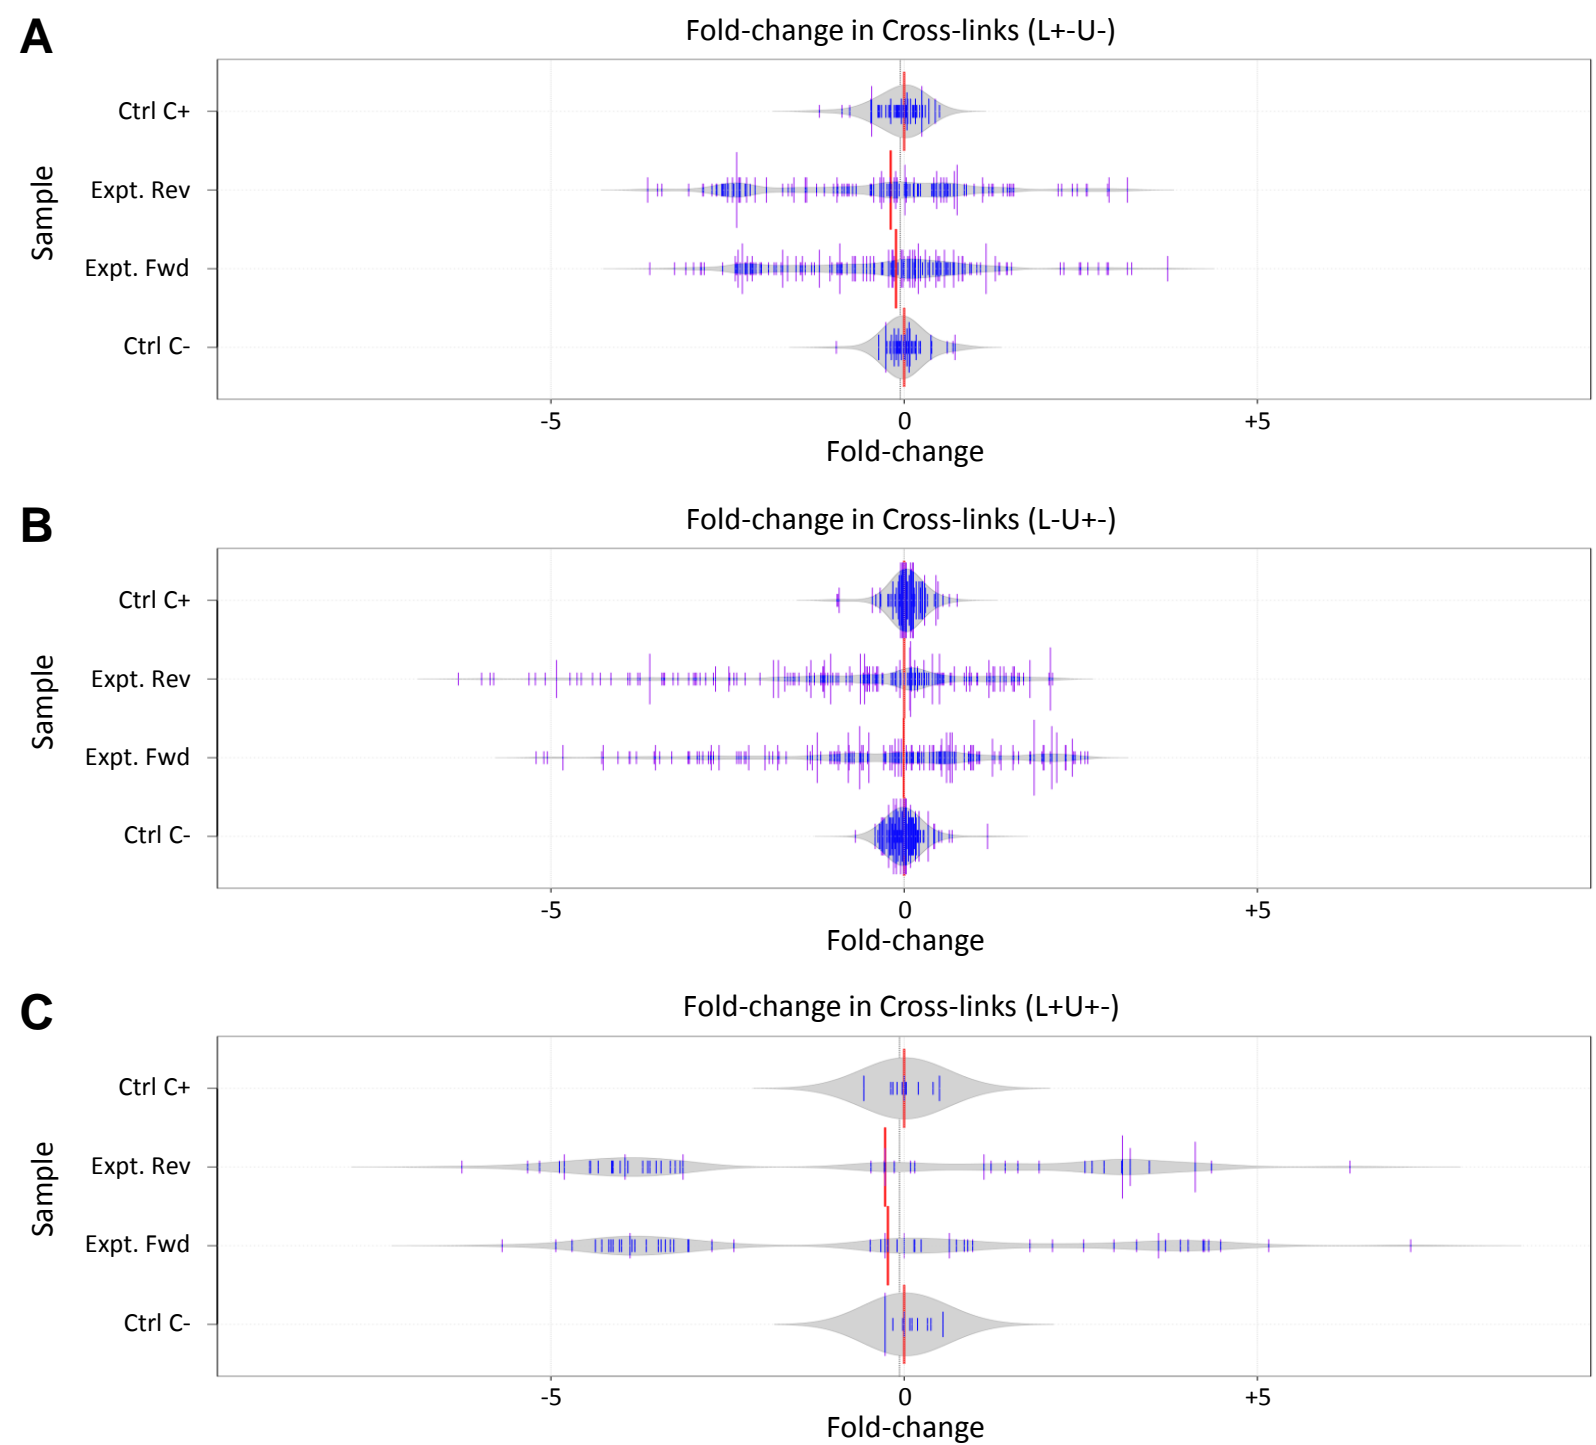

Figure S1a. Bean plots (generated with BoxPlotR) showing the distribution of XiQ quantified fold-change ( $\log_2(\text{H/L ratio})$ ) for cross-links in control and experimental samples for (A) SpyL32P +/- Im7 datasets, (B) SpyL32P +/- 8M Urea datasets, and (C) SpyL32P+Im7 +/- 8M Urea datasets. The fold-change of the reverse-labeled experimental sample is shown as  $\log_2(\text{H/L ratio}) * (-1)$ .

### Fold-change in Cross-links (L+-U-)

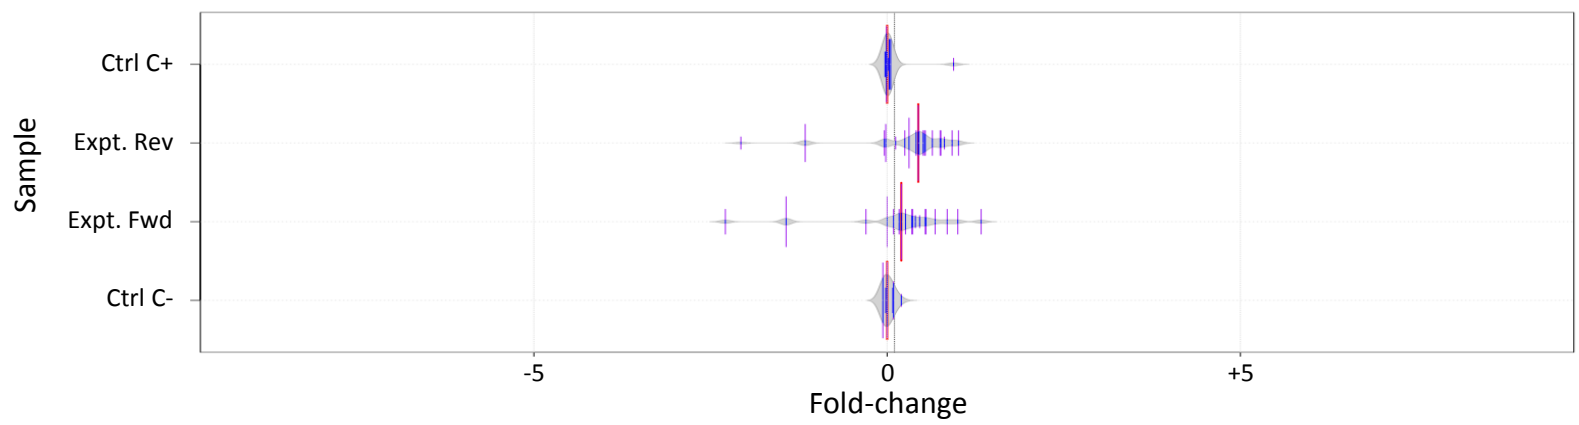

Figure S1b. Bean plots (generated with BoxPlotR) showing the distribution of XiQ quantified fold-change ( $\log_2(\text{H/L ratio})$ ) for cross-links in control and experimental samples for FKBP25 F145A I223P +/- rapamycin datasets. The fold-change of the reverse-labeled experimental sample is shown as  $\log_2(\text{H/L ratio}) * (-1)$ .

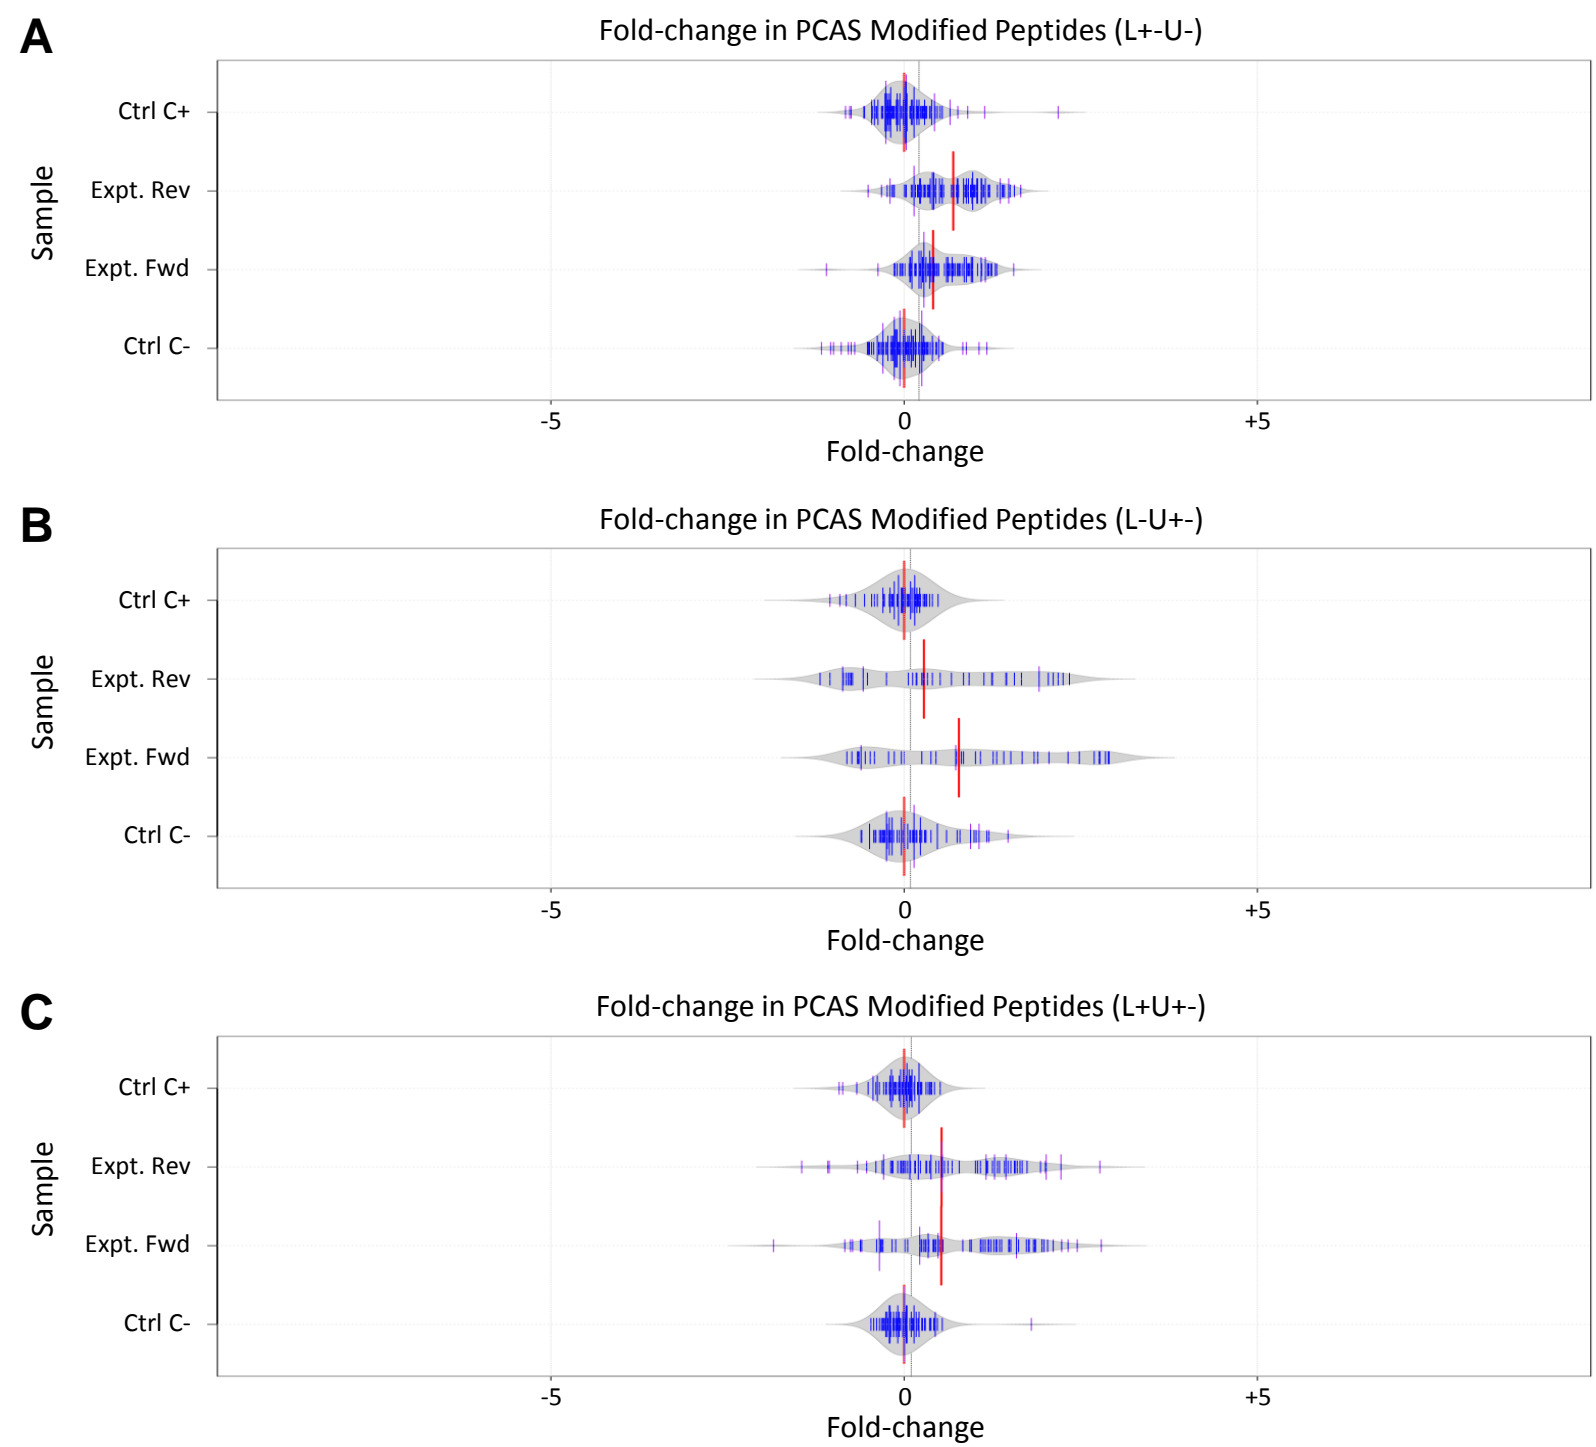

Figure S2a. Bean plots (generated with BoxPlotR) showing the distribution of XiQ quantified fold-change ( $\log_2(H/L \text{ ratio})$ ) for PCAS-modified peptides in control and experimental samples for (A) SpyL32P +/- Im7 datasets, (B) SpyL32P +/- 8M Urea datasets, and (C) SpyL32P+Im7 +/- 8M Urea datasets. The fold-change of the reverse-labeled experimental sample is shown as  $\log_2(H/L \text{ ratio}) * (-1)$ .

### Fold-change in PCAS Modified Peptides (L+-U-)

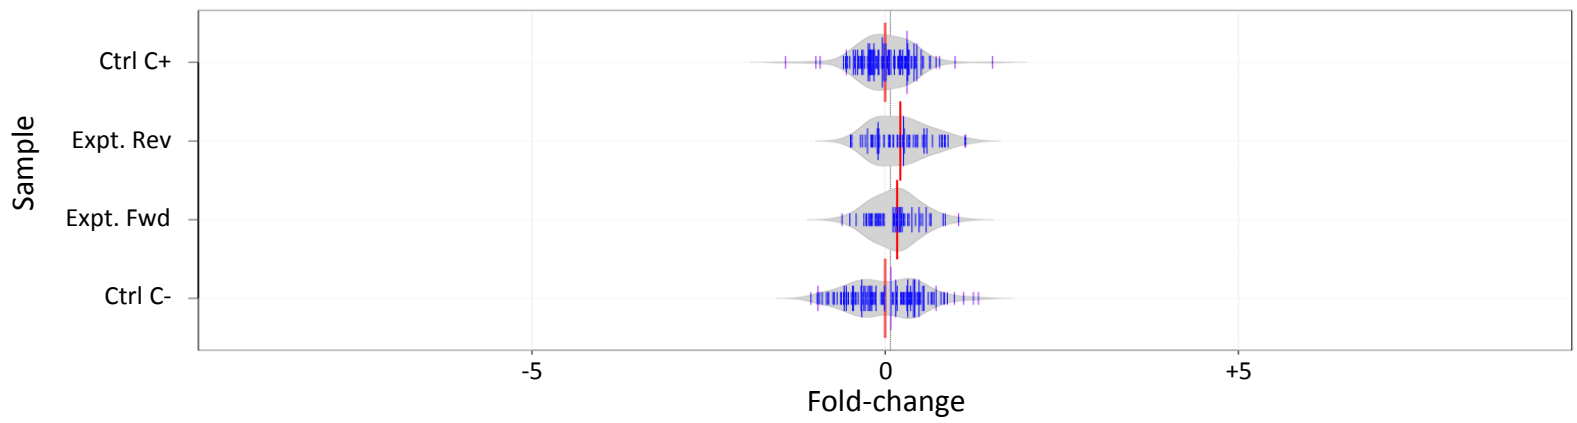

Figure S2b. Bean plots (generated with BoxPlotR) showing the distribution of XiQ quantified fold-change ( $\log_2(\text{H/L ratio})$ ) for PCAS-modified peptides in control and experimental samples for FKBP25 F145A I223P +/- rapamycin datasets. The fold-change of the reverse-labeled experimental sample is shown as  $\log_2(\text{H/L ratio}) * (-1)$ .

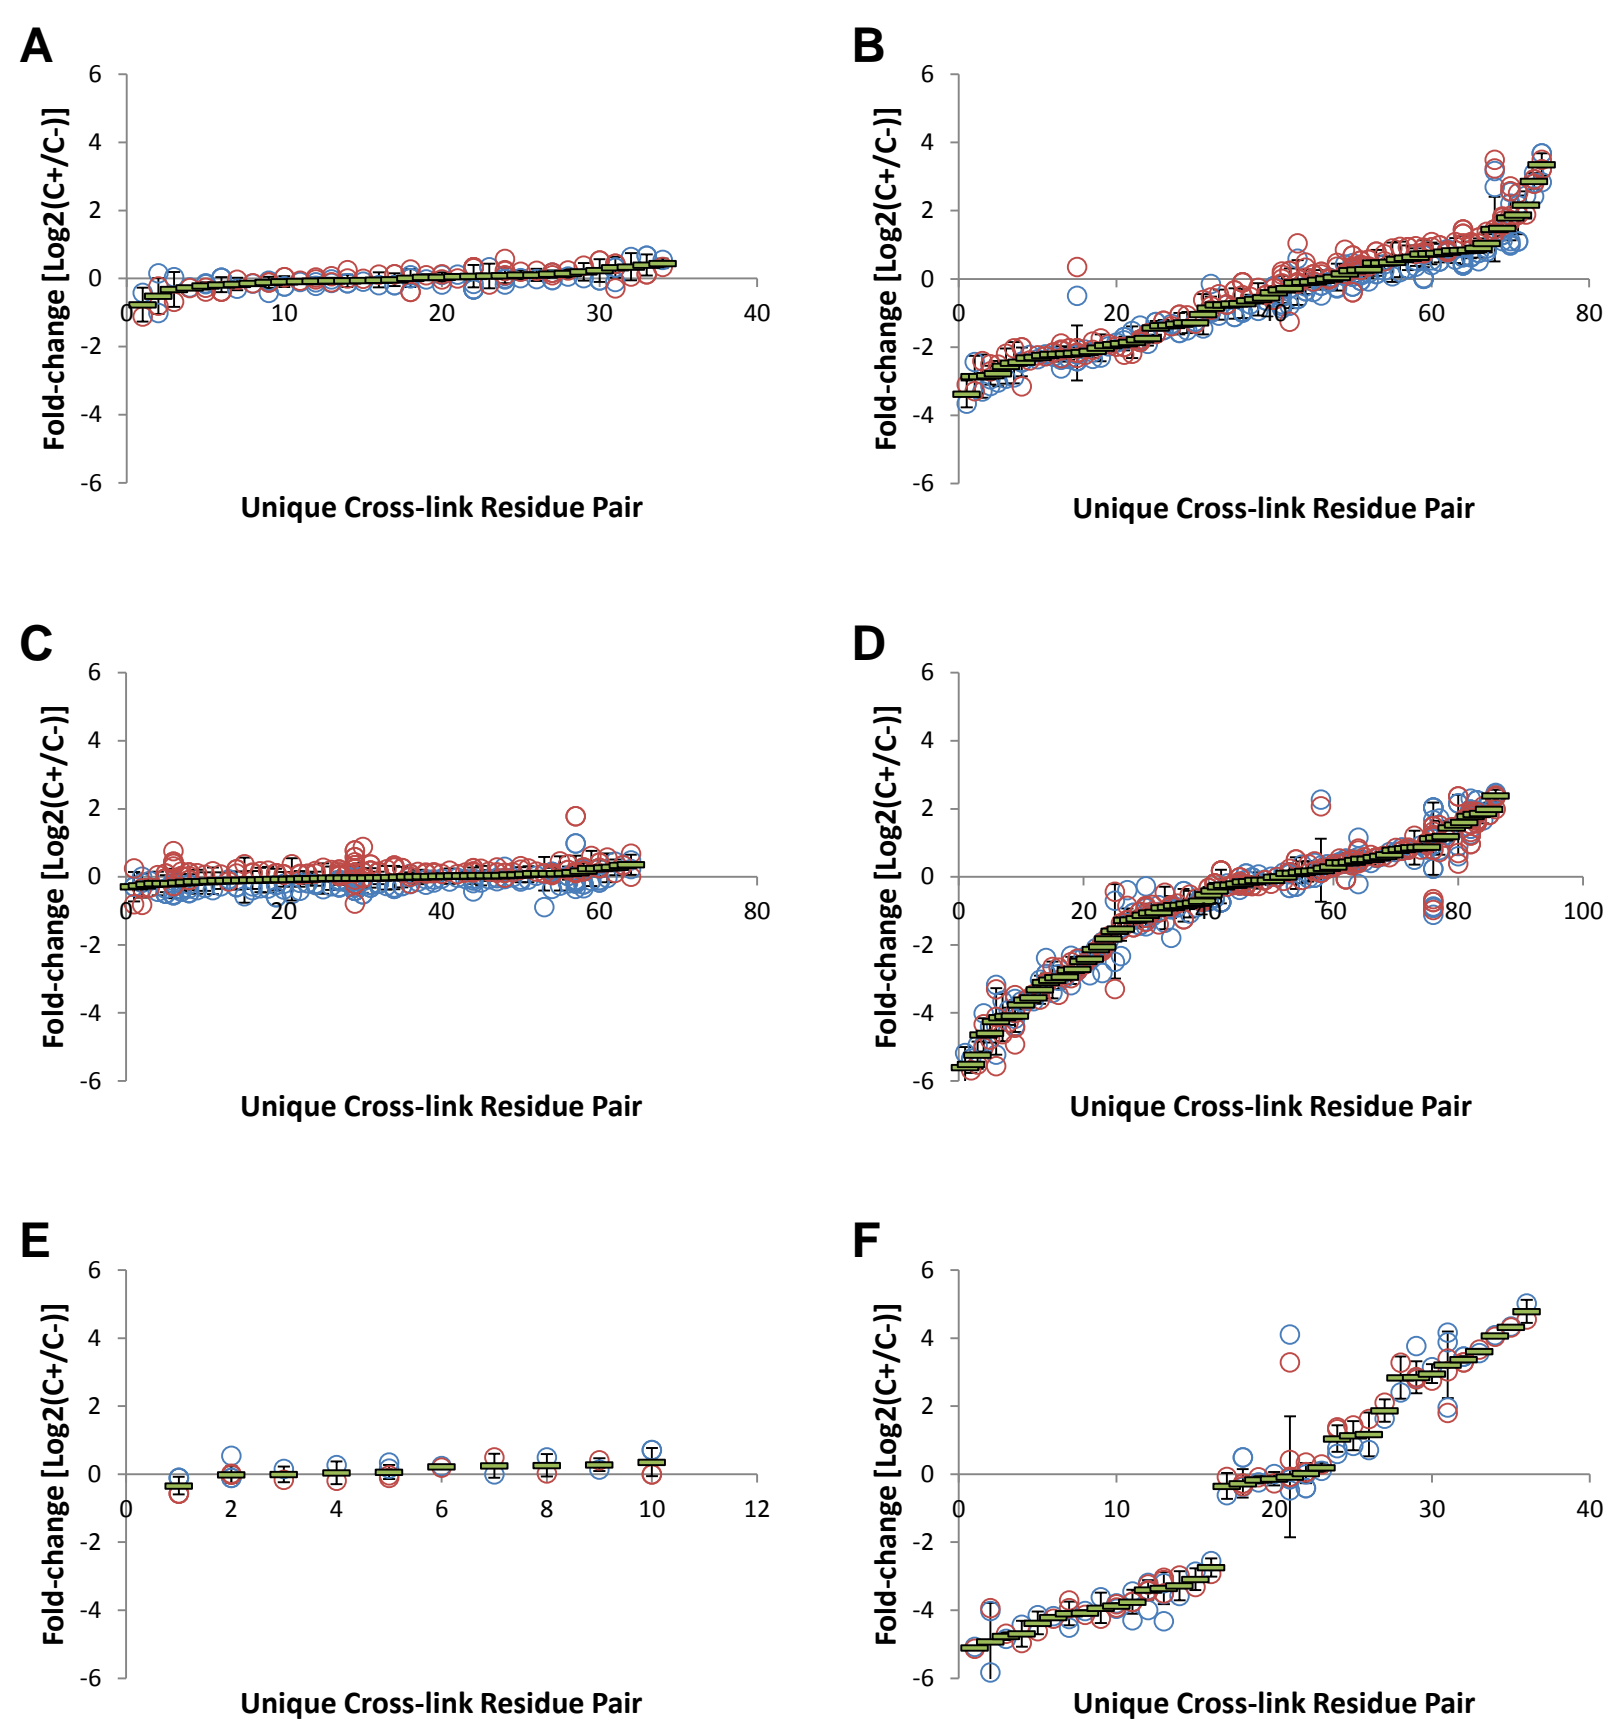

Figure S3a. Range of observed  $\log_2(H/L)$  ratio for all quantified cross-links. Blue circles represent data for control condition(-) or experimental forward-labeled cross-links and red circles represent data for control condition(+) or experimental reverse-labeled cross-links. Green bars indicate median fold-change. The fold-change of the reverse-labeled experimental sample is shown as  $\log_2(H/L) * (-1)$ . (A) SpyL32P condition(+/- Im7) control samples. (B) SpyL32P condition(+/- Im7) experimental samples. (C) SpyL32P condition(+/- 8M Urea) control samples. (D) SpyL32P condition(+/- 8M Urea) experimental samples. (E) SpyL32P+Im7 condition(+/- 8M Urea) control samples. (F) SpyL32P+Im7 condition(+/- 8M Urea) experimental samples.

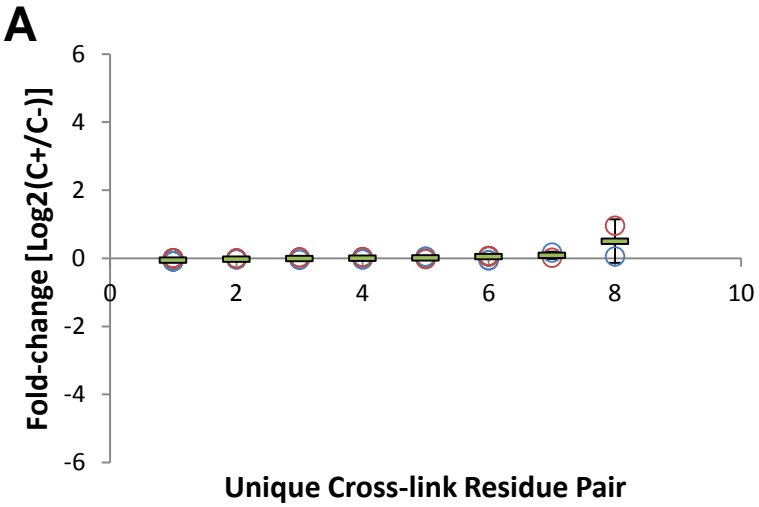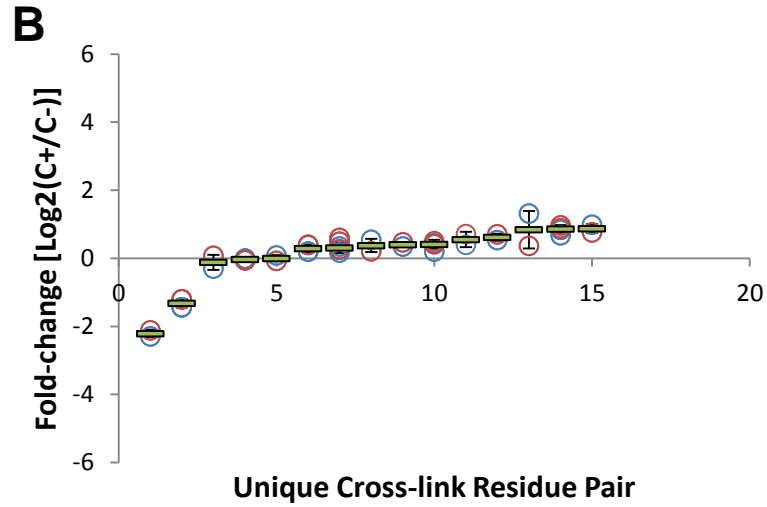

Figure S3b. Range of observed  $\log_2(H/L)$  ratio for all quantified cross-links. Blue circles represent data for control condition(-) or experimental forward-labeled cross-links and red circles represent data for control condition(+) or experimental reverse-labeled cross-links. Green bars indicate median fold-change. The fold-change of the reverse-labeled experimental sample is shown as  $\log_2(H/L) * (-1)$ . **(A)** FKBP25 F145A I223P condition(+/- rapamycin) control samples. **(B)** FKBP25 F145A I223P condition(+/- rapamycin) experimental samples.

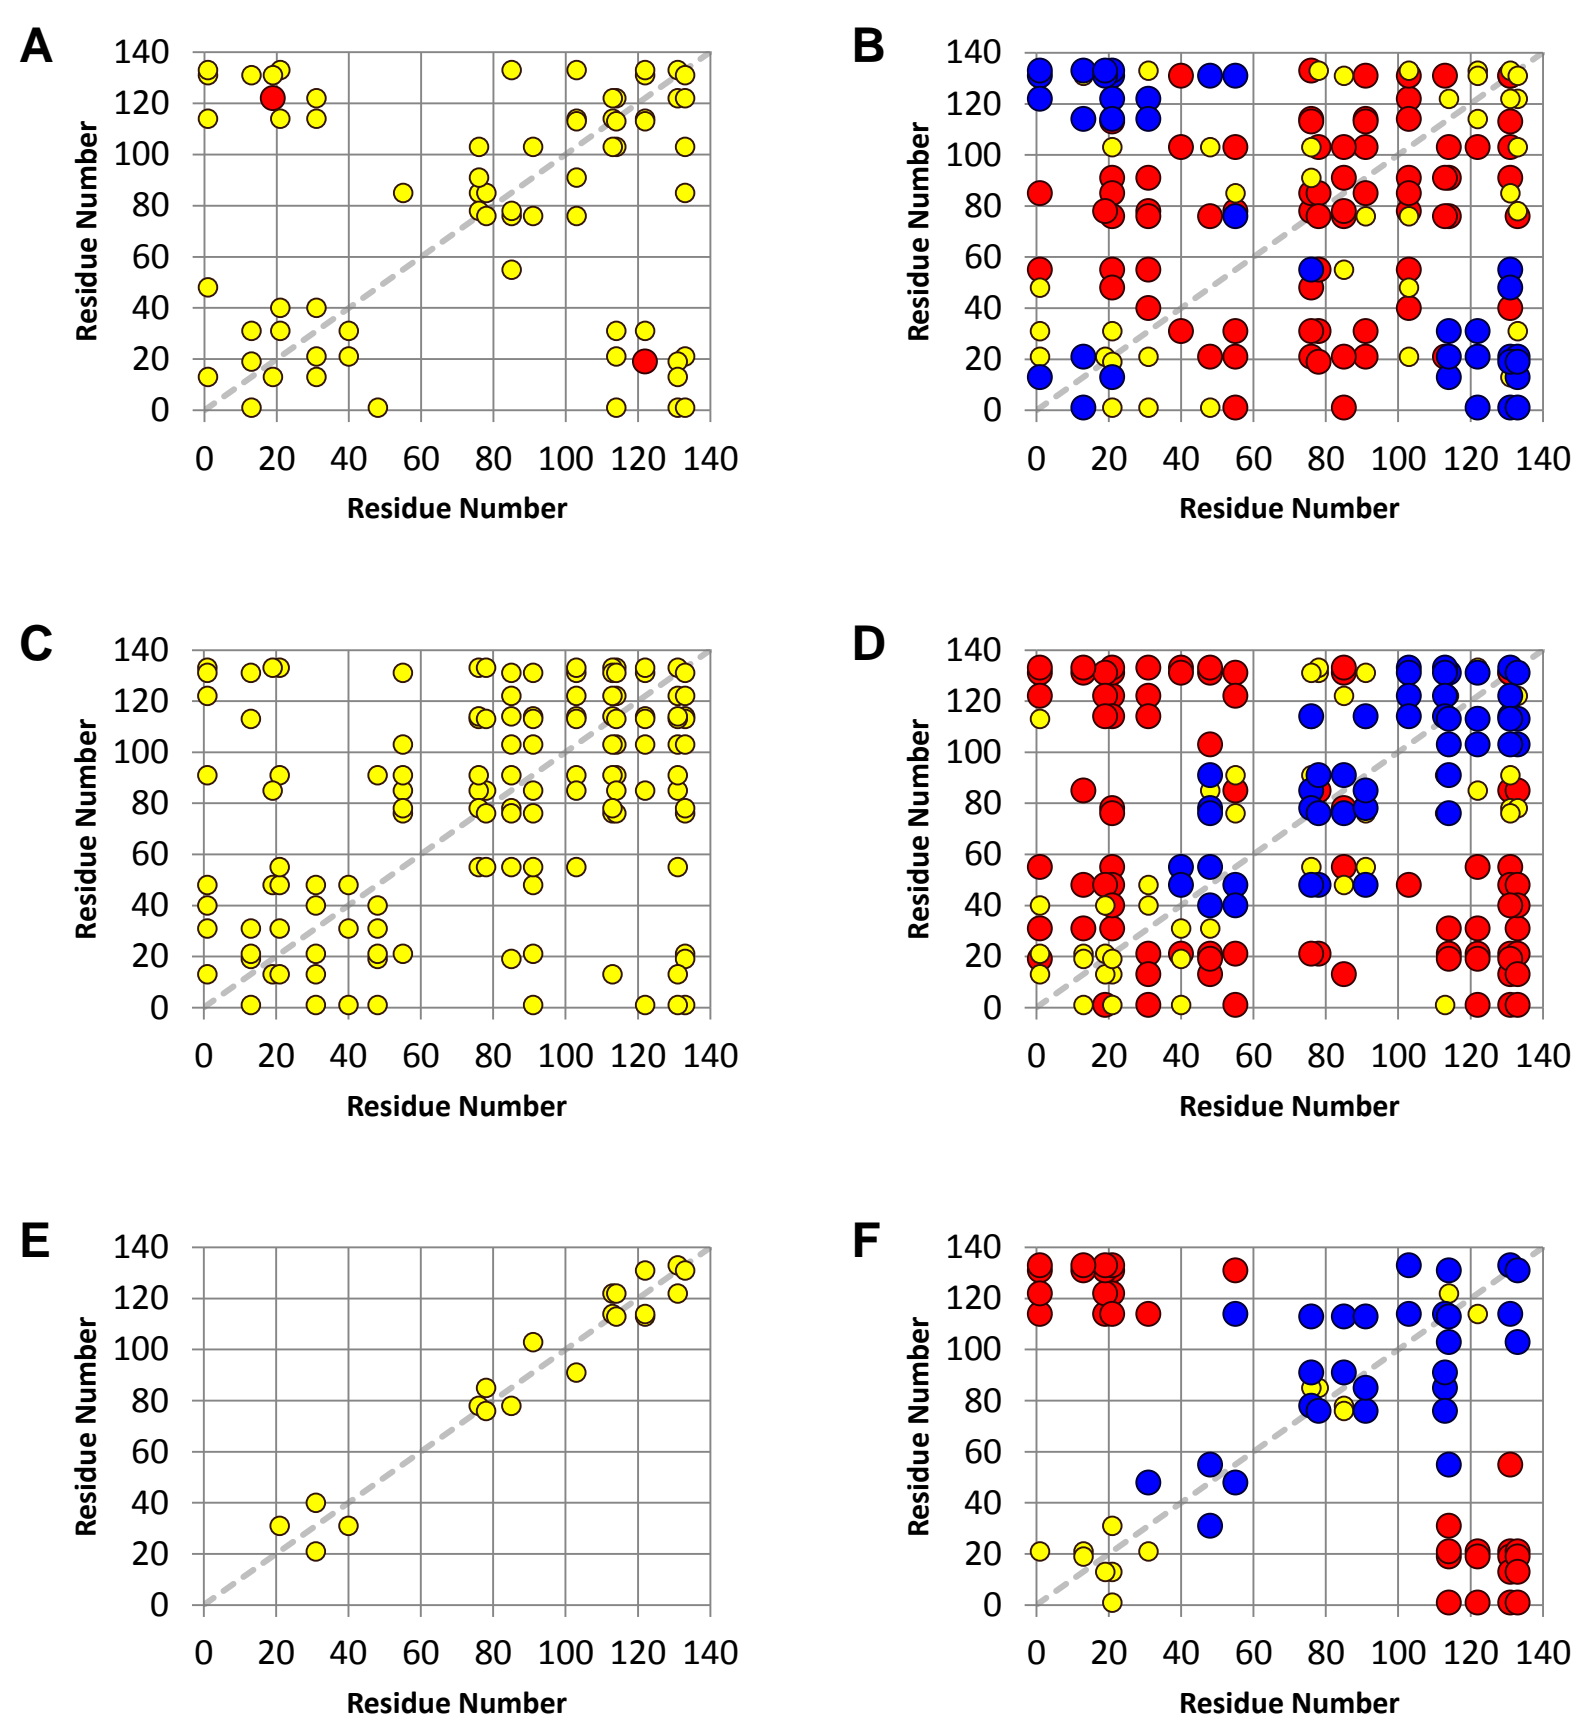

Figure S4a. Cross-link contact maps. **(A)** SpyL32P condition(+/- Im7) control samples. **(B)** SpyL32P condition(+/- Im7) experimental samples. **(C)** SpyL32P condition(+/- 8M Urea) control samples. **(D)** SpyL32P condition(+/- 8M Urea) experimental samples. **(E)** SpyL32P+Im7 condition(+/- 8M Urea) control samples. **(F)** SpyL32P+Im7 condition(+/- 8M Urea) experimental samples. Red circles indicate cross-links are enriched in condition(-). Blue circles indicate cross-links are enriched in condition(+). Yellow circles indicate no significant change between in cross-link abundance between condition(-) and condition(+). Thresholds for significance are reported in supplementary table 1.

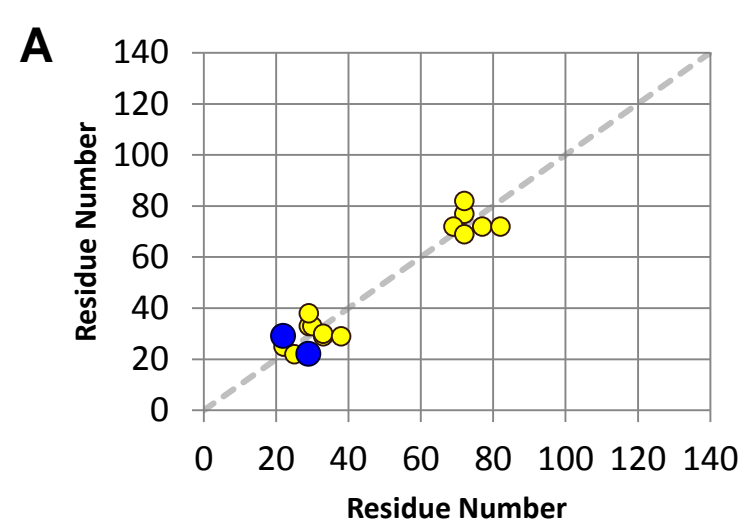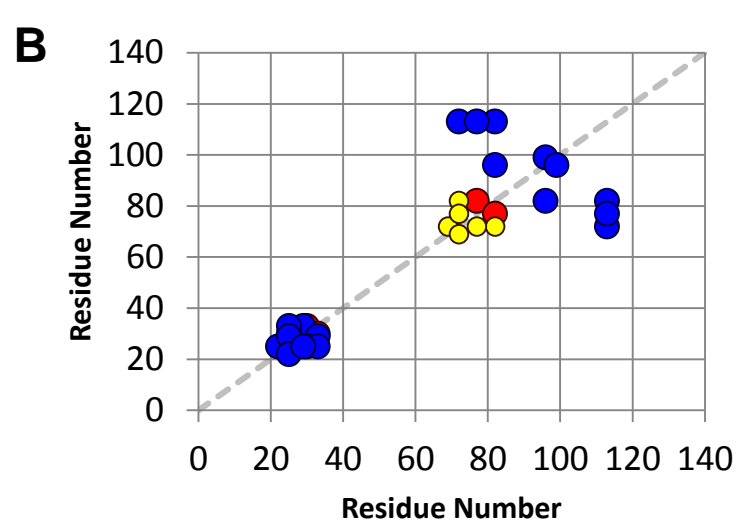

Figure S4b. Cross-link contact maps. **(A)** FKBP25 F145A I223P condition(+/- rapamycin) control samples. **(B)** FKBP25 F145A I223P condition(+/- rapamycin) experimental samples. Thresholds for significance are reported in supplementary table 1.



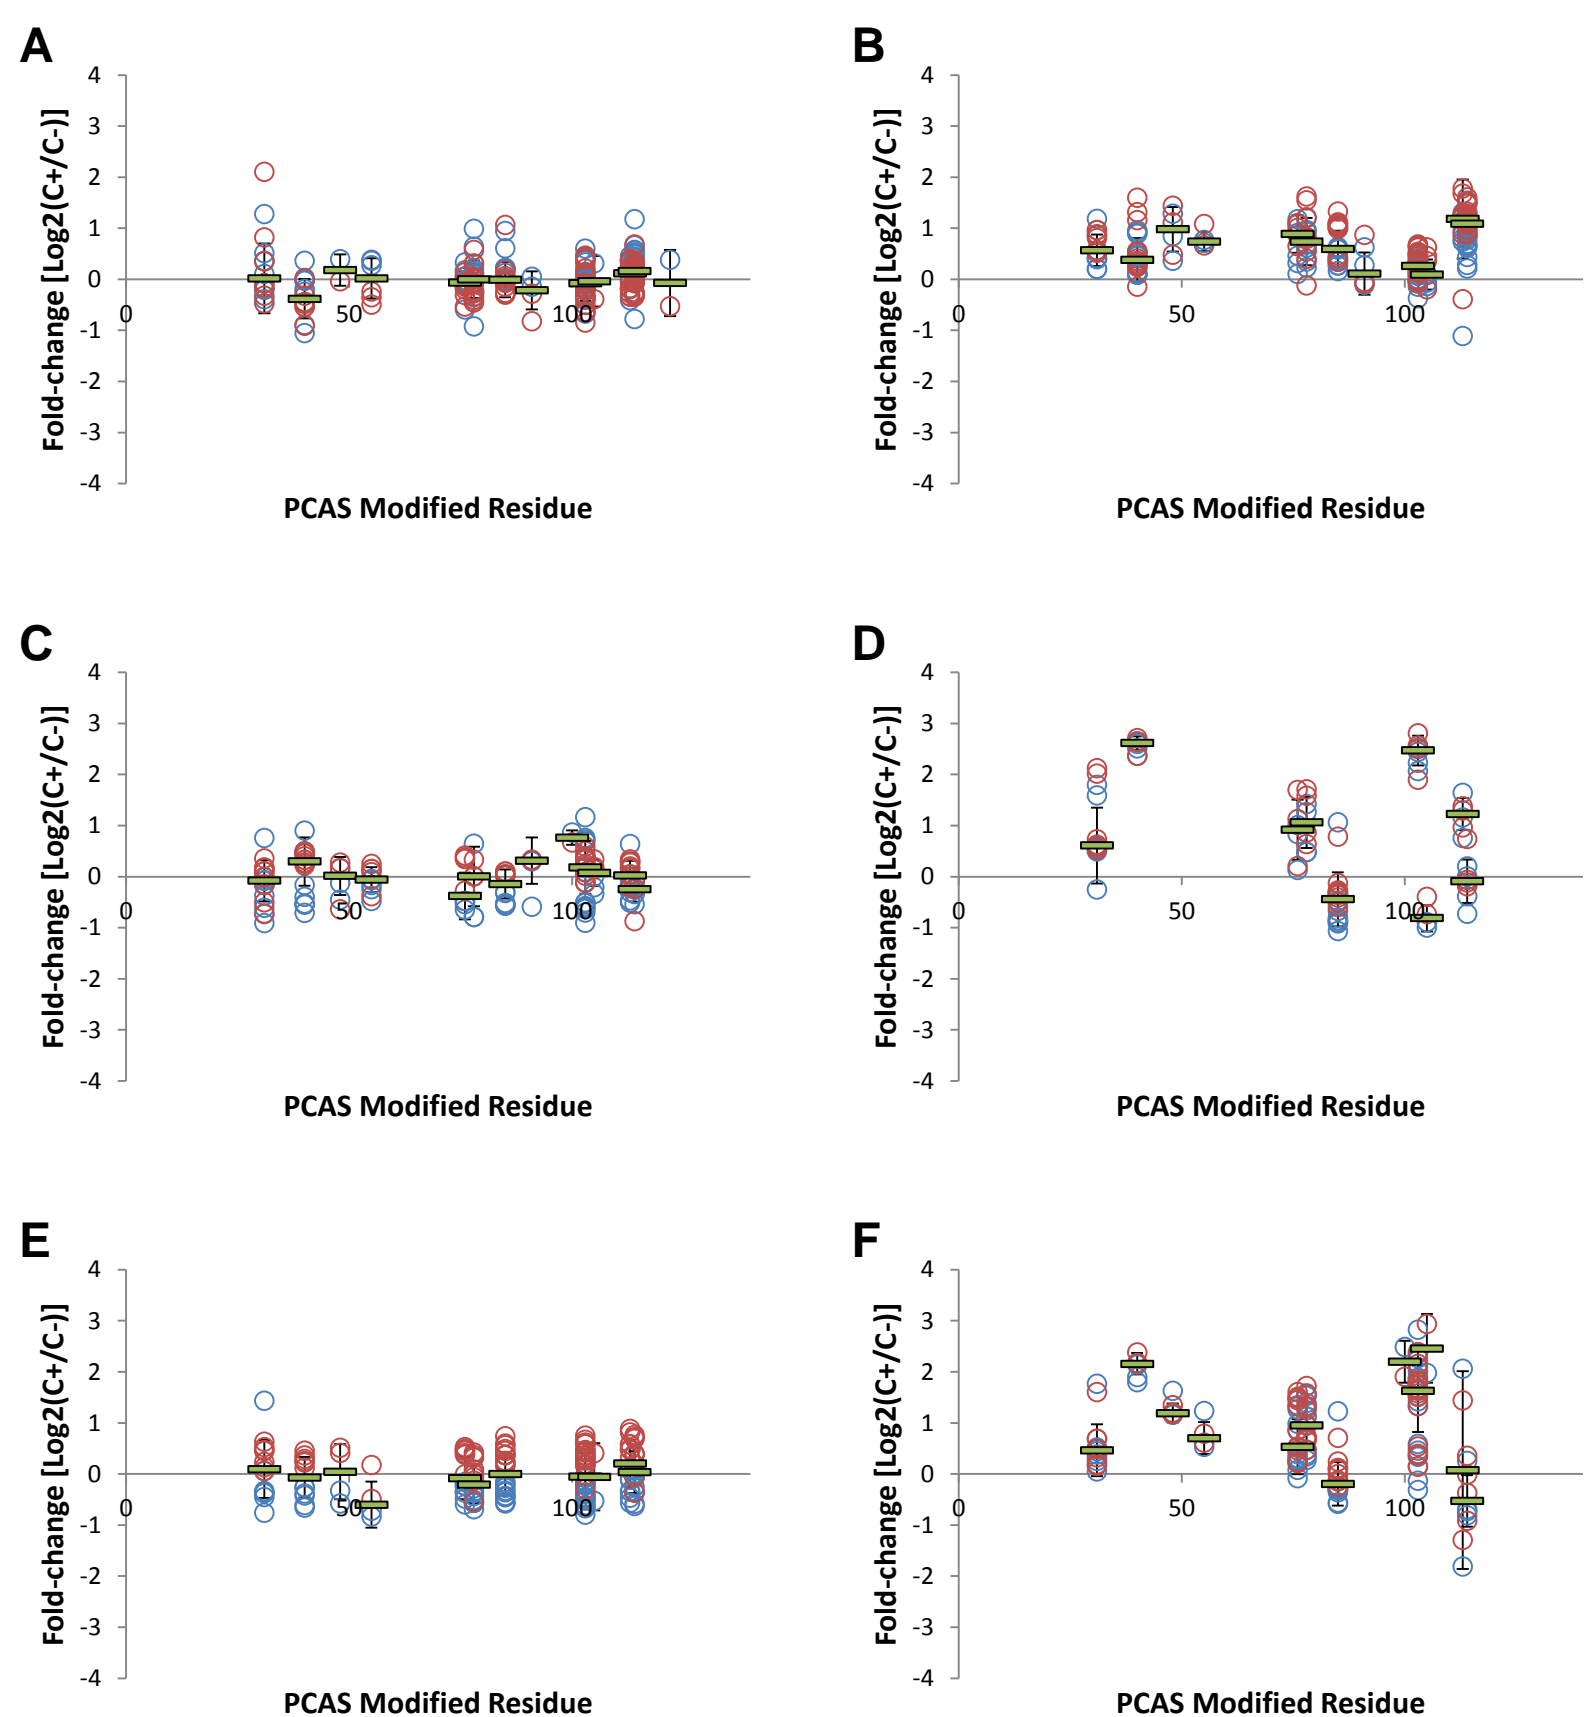

Figure S5a. Range of observed  $\log_2(H/L)$  ratio for all quantified PCAS-modified peptides. Blue circles represent data for control condition(-) or experimental forward-labeled cross-links and red circles represent data for control condition(+) or experimental reverse-labeled cross-links. Green bars indicate median fold-change. The fold-change of the reverse-labeled experimental sample is shown as  $\log_2(H/L \text{ ratio}) * (-1)$ . (A) SpyL32P condition(+/- Im7) control samples. (B) SpyL32P condition(+/- Im7) experimental samples. (C) SpyL32P condition(+/- 8M Urea) control samples. (D) SpyL32P condition(+/- 8M Urea) experimental samples. (E) SpyL32P+Im7 condition(+/- 8M Urea) control samples. (F) SpyL32P+Im7 condition(+/- 8M Urea) experimental samples.

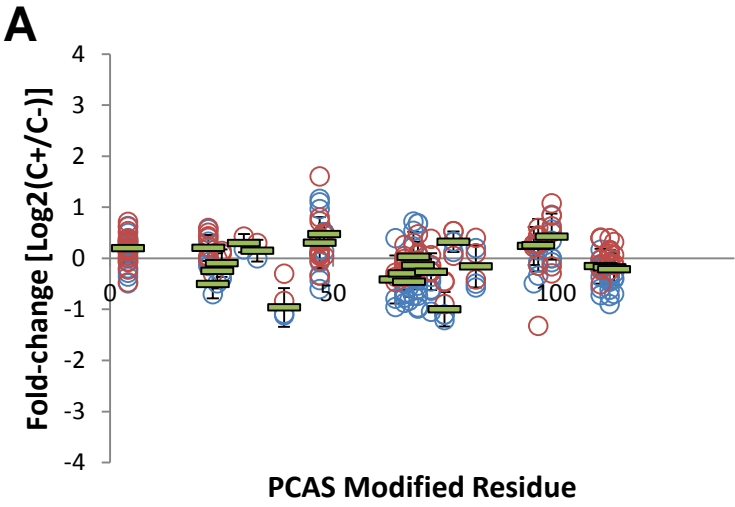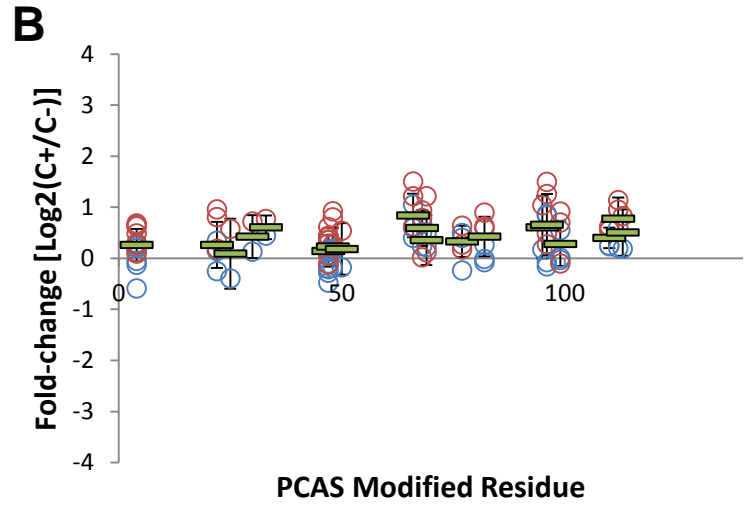

Figure S5b. Range of observed  $\log_2$ (H/L ratio) for all quantified PCAS-modified peptides. Blue circles represent data for control condition(-) or experimental forward-labeled cross-links and red circles represent data for control condition(+) or experimental reverse-labeled cross-links. Green bars indicate median fold-change. The fold-change of the reverse-labeled experimental sample is shown as  $\log_2$ (H/L ratio)\*(-1). **(A)** FKBP25 F145A I223P condition(+/- rapamycin) control samples. **(B)** FKBP25 F145A I223P condition(+/- rapamycin) experimental samples.

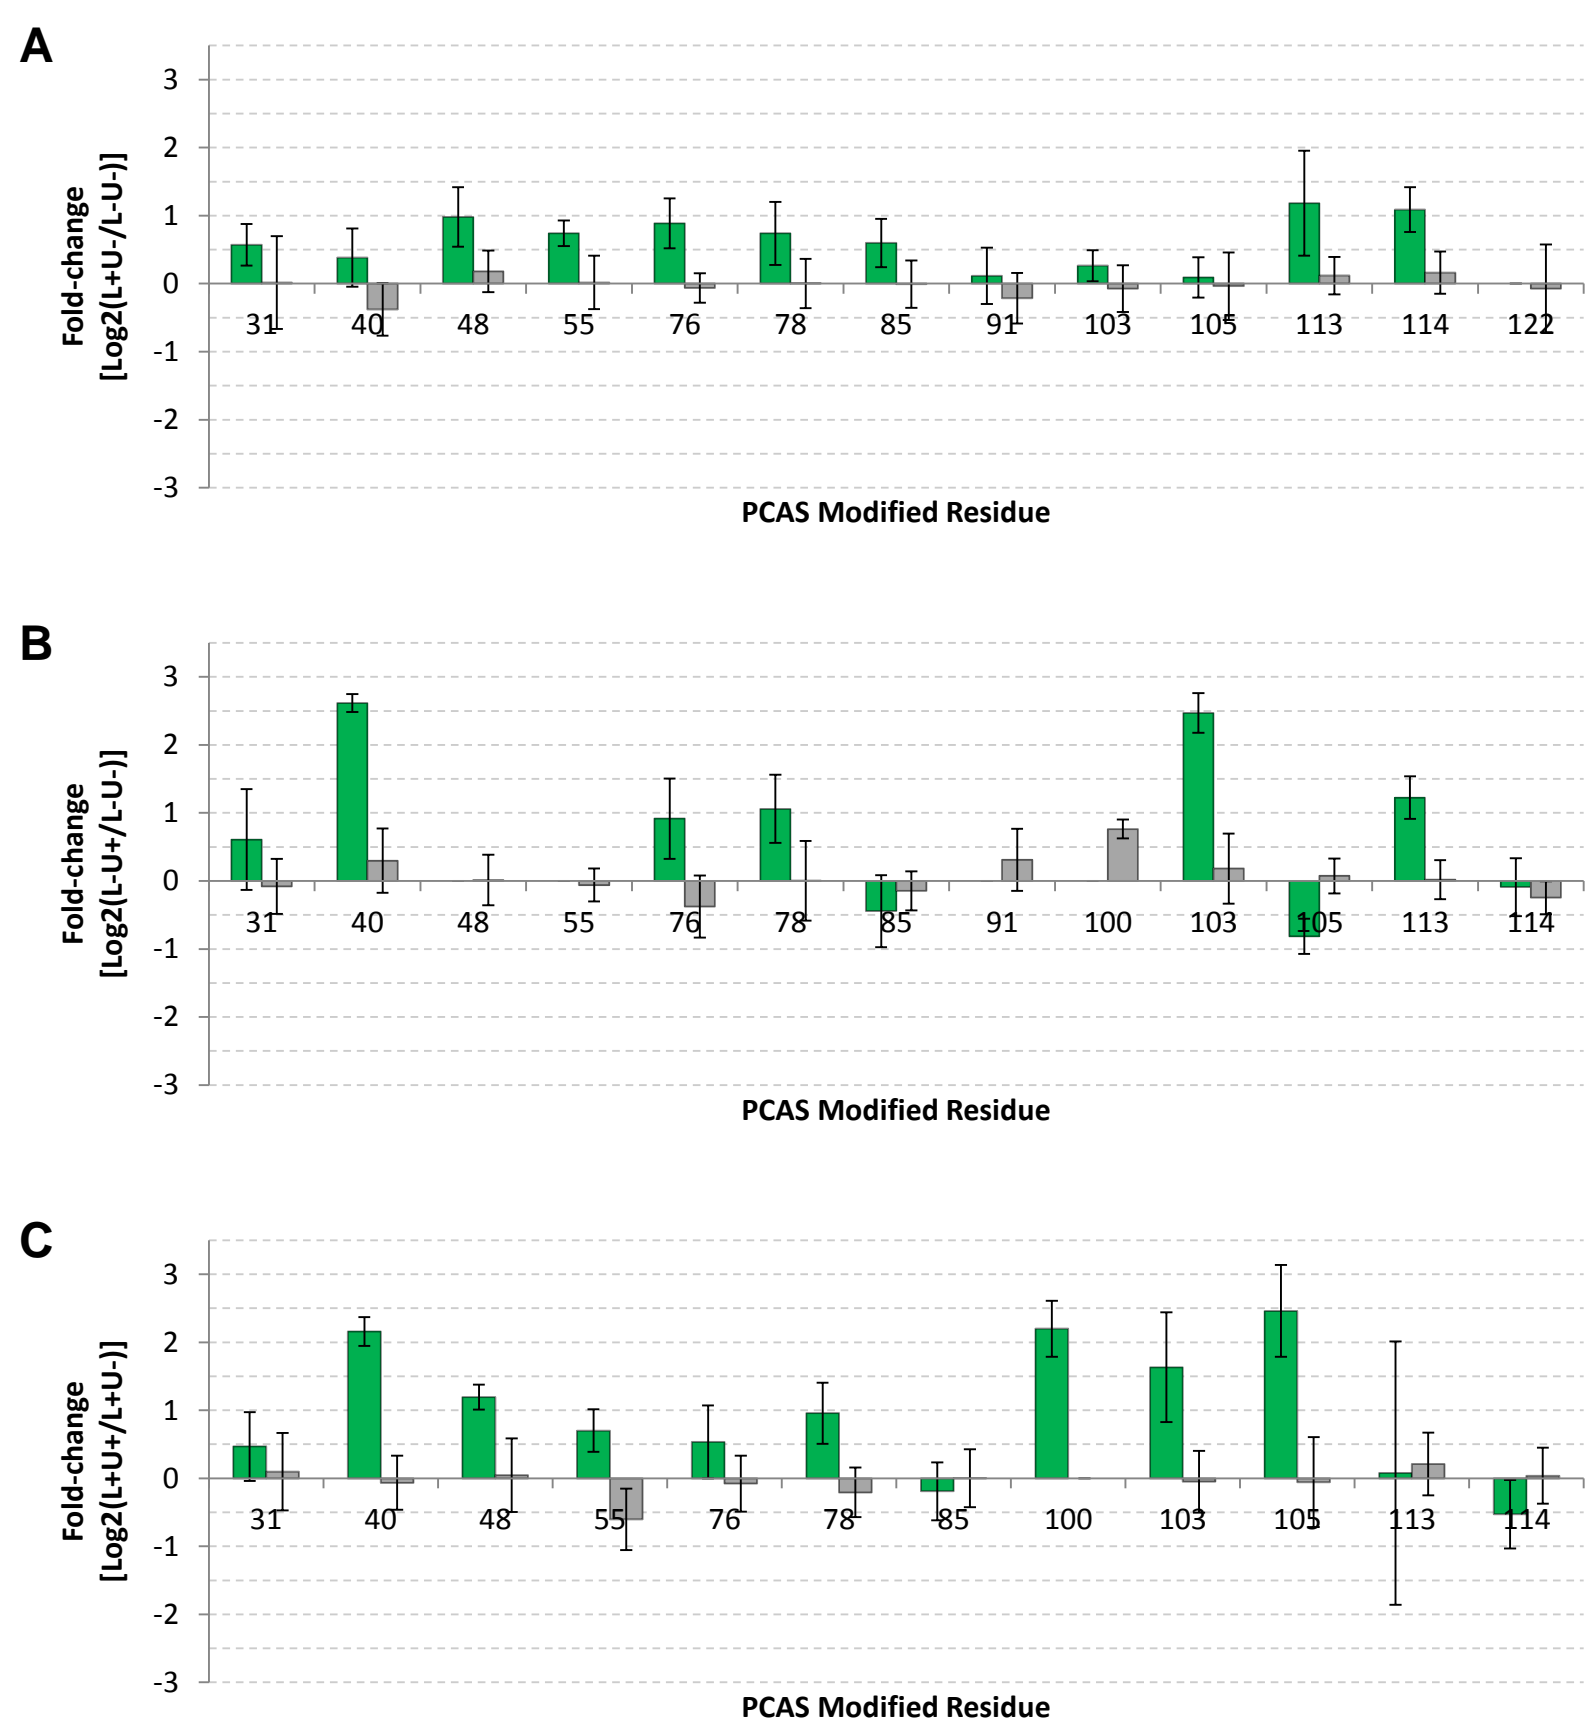

Figure S6a. Unique PCAS-modified residue fold-change column charts. **(A)** SpyL32P condition(+/- Im7) samples. **(B)** SpyL32P condition(+/- 8M Urea) samples. **(C)** SpyL32P+Im7 condition(+/- 8M Urea) samples. Experimental and control sample data are represented by green and grey bars, respectively. Error bars indicate standard error for all identified PCAS-modified peptides with modification on respective residue.

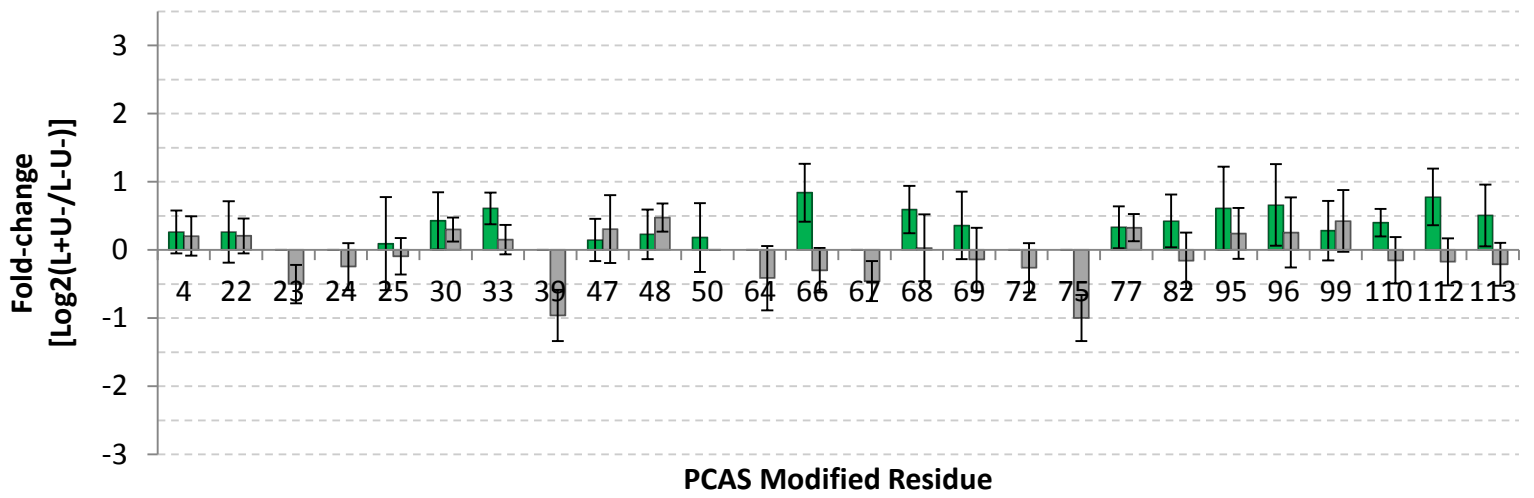

Figure S6b. Unique PCAS-modified residue fold-change column charts for FKBP25 F145A I223P condition(+/- rapamycin) control samples. Experimental and control sample data are represented by green and grey bars, respectively. Error bars indicate standard error for all identified PCAS-modified peptides with modification on respective residue.

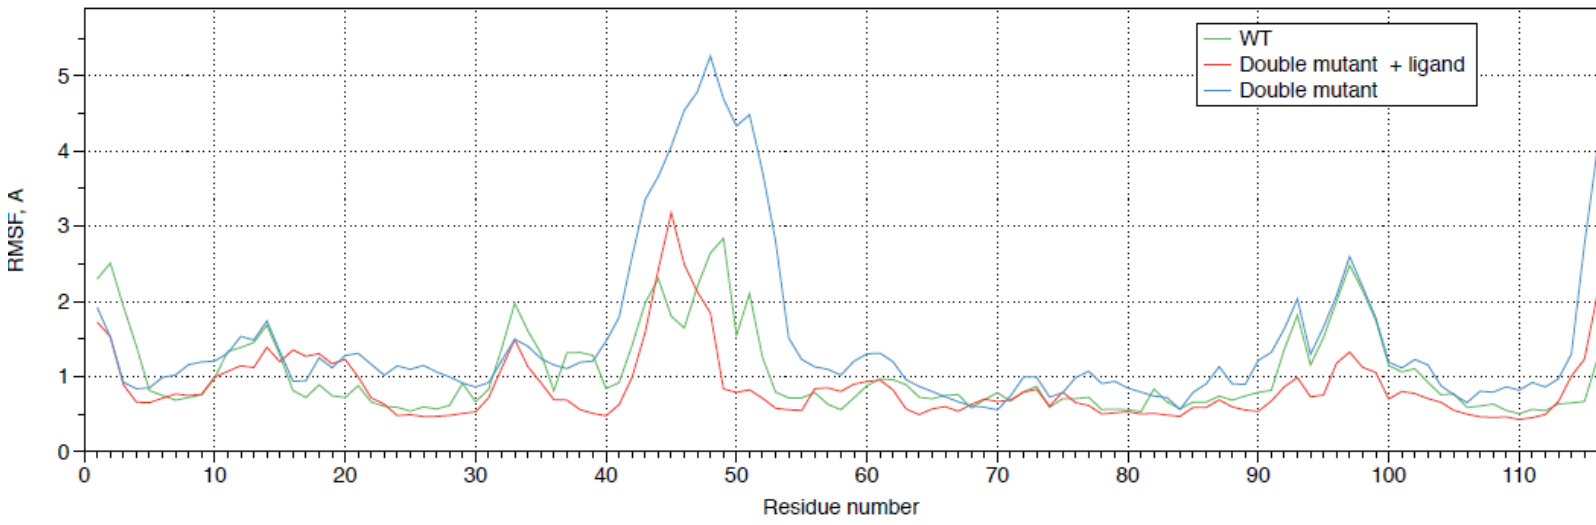

Figure S7. Main chain fluctuations along MD trajectory.

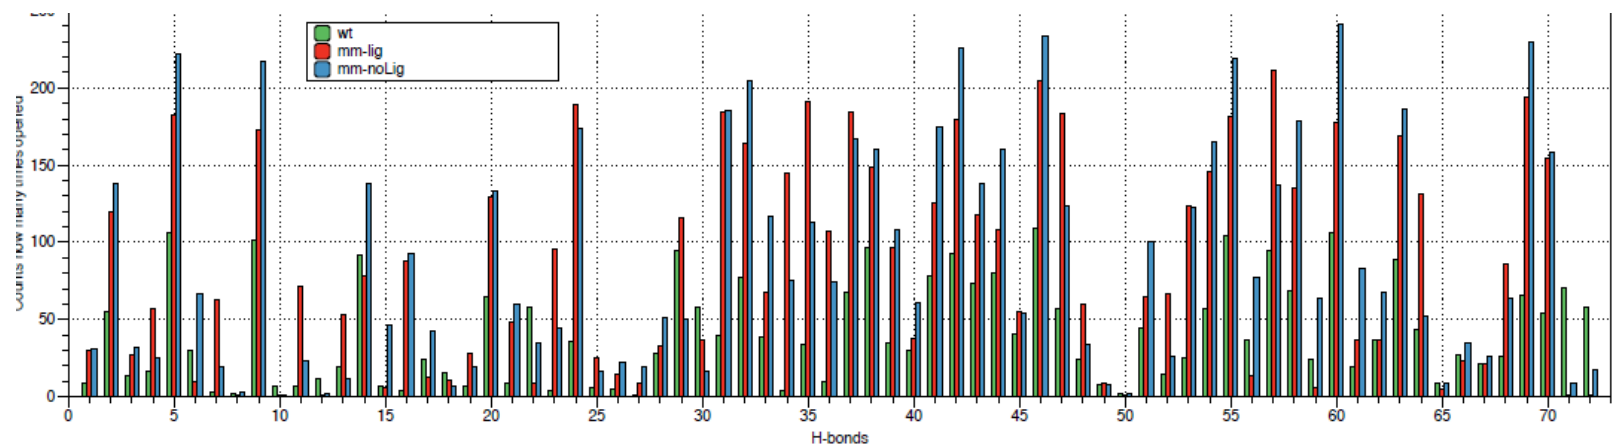

Figure S8. Frequencies of opening along MD trajectory of the backbone amide donor-acceptor pairs.

Table S1. Standard deviation of fold-change [ $\text{Log}_2(\text{C+}/\text{C-})$ ] Significance thresholds used classification of corresponding  $\text{log}_2(\text{H}/\text{L}$  ratio) medians as enriched in condition(-), condition(+), or unchanged are calculated as 2x the sample standard deviation.

| <b>Experiment</b> | <b>Control Condition(-) and Condition(+)<br/>Fold-change [<math>\text{Log}_2(\text{C+}/\text{C-})</math>]<br/>Sample Standard Deviation (s)</b> | <b>Experiment Forward and Reverse<br/>Significance Fold-change [<math>\text{Log}_2(\text{C+}/\text{C-})</math>]<br/>Threshold (+/-2s)</b> |
|-------------------|-------------------------------------------------------------------------------------------------------------------------------------------------|-------------------------------------------------------------------------------------------------------------------------------------------|
| Spy qCL L+-U-     | 0.298                                                                                                                                           | 0.597                                                                                                                                     |
| Spy qCL L-U+-     | 0.234                                                                                                                                           | 0.469                                                                                                                                     |
| Spy qCL L+U+-     | 0.311                                                                                                                                           | 0.622                                                                                                                                     |
| Spy SM L+-U-      | 0.373                                                                                                                                           | 0.746                                                                                                                                     |
| Spy SM L-U+-      | 0.382                                                                                                                                           | 0.764                                                                                                                                     |
| Spy SM L+U+-      | 0.280                                                                                                                                           | 0.561                                                                                                                                     |
| FKBP qCL L+-U-    | 0.134                                                                                                                                           | 0.268                                                                                                                                     |
| FKBP SM L+-U-     | 0.446                                                                                                                                           | 0.893                                                                                                                                     |
| FKBP SM L-U+-     | 0.721                                                                                                                                           | 1.442                                                                                                                                     |
| FKBP SM L+U+-     | 0.687                                                                                                                                           | 1.374                                                                                                                                     |

Table S2. Sample naming convention and conditions.

| Sample # | Ligand | Urea | Isotopic Label |
|----------|--------|------|----------------|
| 01       | -      | -    | Light          |
| 02       | -      | -    | Heavy          |
| 04       | -      | +    | Light          |
| 05       | -      | +    | Heavy          |
| 07       | +      | -    | Light          |
| 08       | +      | -    | Heavy          |
| 10       | +      | +    | Light          |
| 11       | +      | +    | Heavy          |



Table S3. Sample combination reference table.

| <b>Sample</b>              | <b>L+U-</b> | <b>L-U+</b> | <b>L+U+</b> |
|----------------------------|-------------|-------------|-------------|
| Ctrl Condition (-)         | 01-02       | 01-02       | 07-08       |
| Experimental Forward Label | 01-08       | 01-05       | 07-11       |
| Experimental Reverse Label | 02-07       | 02-04       | 08-10       |
| Ctrl Condition (+)         | 07-08       | 04-05       | 10-11       |



## S. Material. Raw data to be uploaded.

e.g.

| Name                                                                                                                                                 | Date modified      | Type              | Size       |
|------------------------------------------------------------------------------------------------------------------------------------------------------|--------------------|-------------------|------------|
|  20160426_FKBP25_F145A_I223P_1213.raw                               | 4/28/2016 8:01 PM  | Xcalibur Raw File | 433,157 KB |
|  20160426_FKBP25_F145A_I223P_1312.raw                               | 4/28/2016 10:09 PM | Xcalibur Raw File | 365,506 KB |
|  20160426_FKBP25_F145A_I223P_ctrl.raw                               | 4/28/2016 4:29 PM  | Xcalibur Raw File | 556,540 KB |
|  20160426_FKBP25_F145A_I223P_rap_ctrl.raw                           | 4/28/2016 5:53 PM  | Xcalibur Raw File | 342,673 KB |
|  20160620_FKBP25_F145A_I223P_PCASurea_ctrl.raw                      | 6/30/2016 2:10 PM  | Xcalibur Raw File | 442,843 KB |
|  20160620_FKBP25_F145A_I223P_PCASurea_DH.raw                        | 6/30/2016 12:17 PM | Xcalibur Raw File | 439,103 KB |
|  20160620_FKBP25_F145A_I223P_PCASurea_HD.raw                        | 6/30/2016 10:24 AM | Xcalibur Raw File | 422,603 KB |
|  20160620_FKBP25_F145A_I223P_PCASurea_urea_ctrl.raw                 | 6/30/2016 3:34 PM  | Xcalibur Raw File | 438,311 KB |
|  20160620_FKBP25_F145A_I223P_rap_PCASurea_ctrl.raw                  | 6/30/2016 9:12 PM  | Xcalibur Raw File | 429,375 KB |
|  20160620_FKBP25_F145A_I223P_rap_PCASurea_DH.raw                    | 6/30/2016 7:19 PM  | Xcalibur Raw File | 408,323 KB |
|  20160620_FKBP25_F145A_I223P_rap_PCASurea_HD.raw                    | 6/30/2016 5:26 PM  | Xcalibur Raw File | 388,318 KB |
|  20160620_FKBP25_F145A_I223P_rap_PCASurea_urea_ctrl.raw             | 6/30/2016 10:36 PM | Xcalibur Raw File | 412,905 KB |
|  20160720_SpyL32P_qCL_DSA-12C6-13C6_100uM_01-02_TDSol_OT_OT_TN.raw  | 7/21/2016 1:17 AM  | Xcalibur Raw File | 577,115 KB |
|  20160720_SpyL32P_qCL_DSA-12C6-13C6_100uM_01-05_TDSol_OT_OT_TN.raw  | 7/21/2016 4:01 AM  | Xcalibur Raw File | 530,167 KB |
|  20160720_SpyL32P_qCL_DSA-12C6-13C6_100uM_01-08_TDSol_OT_OT_TN.raw  | 7/21/2016 6:45 AM  | Xcalibur Raw File | 448,081 KB |
|  20160720_SpyL32P_qCL_DSA-12C6-13C6_100uM_02-04_TDSol_OT_OT_TN.raw  | 7/21/2016 9:28 AM  | Xcalibur Raw File | 625,172 KB |
|  20160720_SpyL32P_qCL_DSA-12C6-13C6_100uM_02-07_TDSol_OT_OT_TN.raw  | 7/21/2016 12:13 PM | Xcalibur Raw File | 519,773 KB |
|  20160720_SpyL32P_qCL_DSA-12C6-13C6_100uM_04-05_TDSol_OT_OT_TN.raw  | 7/21/2016 2:57 PM  | Xcalibur Raw File | 750,112 KB |
|  20160720_SpyL32P_qCL_DSA-12C6-13C6_100uM_07-08_TDSol_OT_OT_TN.raw  | 7/21/2016 5:41 PM  | Xcalibur Raw File | 414,269 KB |
|  20160720_SpyL32P_qCL_DSA-12C6-13C6_100uM_07-11_TDSol_OT_OT_TN.raw  | 7/21/2016 8:25 PM  | Xcalibur Raw File | 380,938 KB |
|  20160720_SpyL32P_qCL_DSA-12C6-13C6_100uM_08-10_TDSol_OT_OT_TN.raw  | 7/21/2016 11:09 PM | Xcalibur Raw File | 435,076 KB |
|  20160720_SpyL32P_qCL_DSA-12C6-13C6_100uM_10-11_TDSol_OT_OT_TN.raw | 7/22/2016 1:53 AM  | Xcalibur Raw File | 832,665 KB |
|  20160720_SpyL32P_SM_PCAS-H4-D4_10mM_01-02_PepSol_OT_OT_TN.raw    | 7/22/2016 5:04 PM  | Xcalibur Raw File | 513,535 KB |
|  20160720_SpyL32P_SM_PCAS-H4-D4_10mM_01-05_PepSol_OT_OT_TN.raw    | 7/22/2016 7:48 PM  | Xcalibur Raw File | 721,328 KB |
|  20160720_SpyL32P_SM_PCAS-H4-D4_10mM_01-08_PepSol_OT_OT_TN.raw    | 7/22/2016 10:32 PM | Xcalibur Raw File | 697,070 KB |
|  20160720_SpyL32P_SM_PCAS-H4-D4_10mM_02-04_PepSol_OT_OT_TN.raw    | 7/23/2016 1:16 AM  | Xcalibur Raw File | 706,956 KB |
|  20160720_SpyL32P_SM_PCAS-H4-D4_10mM_02-07_PepSol_OT_OT_TN.raw    | 7/23/2016 3:59 AM  | Xcalibur Raw File | 649,897 KB |
|  20160720_SpyL32P_SM_PCAS-H4-D4_10mM_04-05_PepSol_OT_OT_TN.raw    | 7/23/2016 6:43 AM  | Xcalibur Raw File | 684,078 KB |
|  20160720_SpyL32P_SM_PCAS-H4-D4_10mM_07-08_PepSol_OT_OT_TN.raw    | 7/23/2016 9:27 AM  | Xcalibur Raw File | 673,614 KB |
|  20160720_SpyL32P_SM_PCAS-H4-D4_10mM_07-11_PepSol_OT_OT_TN.raw    | 7/23/2016 12:11 PM | Xcalibur Raw File | 688,429 KB |
|  20160720_SpyL32P_SM_PCAS-H4-D4_10mM_08-10_PepSol_OT_OT_TN.raw    | 7/23/2016 2:55 PM  | Xcalibur Raw File | 632,741 KB |
|  20160720_SpyL32P_SM_PCAS-H4-D4_10mM_10-11_PepSol_OT_OT_TN.raw    | 7/23/2016 5:40 PM  | Xcalibur Raw File | 622,478 KB |
|  20160911_FKBP25_F145A_I223P_PCAS_sm_1213.raw                     | 9/12/2016 12:18 AM | Xcalibur Raw File | 737,683 KB |
|  20160911_FKBP25_F145A_I223P_PCAS_sm_1312.raw                     | 9/12/2016 3:01 AM  | Xcalibur Raw File | 749,172 KB |
|  20160911_FKBP25_F145A_I223P_PCAS_sm_ctrl.raw                     | 9/12/2016 5:44 AM  | Xcalibur Raw File | 696,162 KB |
|  20160911_FKBP25_F145A_I223P_PCAS_sm_rapctrl.raw                  | 9/12/2016 8:27 AM  | Xcalibur Raw File | 734,700 KB |

## S. Material. PyMOL session files to be uploaded.

e.g.

| Name                                                                                                                                                      | Date modified      | Type               | Size     |
|-----------------------------------------------------------------------------------------------------------------------------------------------------------|--------------------|--------------------|----------|
|  FKBP25_F145A_I223P_1pbk_with_I-TASSER_fused_Nterm__qCL__L+-U-_01.pse    | 11/8/2016 12:15 PM | PyMOL Session File | 485 KB   |
|  FKBP25_F145A_I223P_1pbk_with_I-TASSER_fused_Nterm__qCL+SM__L+-U-_01.pse | 11/8/2016 12:17 PM | PyMOL Session File | 486 KB   |
|  FKBP25_F145A_I223P_1pbk_with_I-TASSER_fused_Nterm__SM__L+-U-_01.pse     | 11/8/2016 11:43 AM | PyMOL Session File | 480 KB   |
|  FKBP25_F145A_I223P_1pbk_with_I-TASSER_fused_Nterm__SM__L+U+-_01.pse     | 11/8/2016 11:44 AM | PyMOL Session File | 479 KB   |
|  FKBP25_F145A_I223P_1pbk_with_I-TASSER_fused_Nterm__SM__L-U+-_01.pse     | 11/8/2016 11:43 AM | PyMOL Session File | 480 KB   |
|  Spy Im7 for 20161014_02_qCL__L+-U-_01.pse                               | 11/8/2016 11:55 AM | PyMOL Session File | 1,501 KB |
|  Spy Im7 for 20161014_02_qCL__L+U+-_01.pse                               | 11/8/2016 11:55 AM | PyMOL Session File | 1,417 KB |
|  Spy Im7 for 20161014_02_qCL__L-U+-_01.pse                               | 11/8/2016 11:55 AM | PyMOL Session File | 1,522 KB |
|  Spy Im7 for 20161014_02_qCL+SM__L+-U-_01.pse                            | 11/8/2016 11:53 AM | PyMOL Session File | 1,501 KB |
|  Spy Im7 for 20161014_02_qCL+SM__L+U+-_01.pse                            | 11/8/2016 11:55 AM | PyMOL Session File | 1,416 KB |
|  Spy Im7 for 20161014_02_qCL+SM__L-U+-_01.pse                            | 11/8/2016 11:54 AM | PyMOL Session File | 1,522 KB |
|  Spy_Im7_for_20161014_02_SM__L+-U-_01.pse                                | 11/8/2016 2:31 PM  | PyMOL Session File | 1,337 KB |
|  Spy_Im7_for_20161014_02_SM__L+U+-_01.pse                                | 11/8/2016 2:33 PM  | PyMOL Session File | 1,337 KB |
|  Spy_Im7_for_20161014_02_SM__L-U+-_01.pse                                | 11/8/2016 2:32 PM  | PyMOL Session File | 1,337 KB |

S. Material. Kojak configuration.

| Name                                                                                                        | Date modified     | Type      | Size |
|-------------------------------------------------------------------------------------------------------------|-------------------|-----------|------|
|  Kojak_qCL_Parameters.conf | 11/9/2016 5:33 PM | CONF File | 3 KB |

e.g.

```
Kojak_qCL_Parameters.conf X
1 # Kojak version 1.5.1 parameter file
2
3 threads = 8
4
5 database = #Concatenated TARGET-DECOY(seq. reversal) of FKBP25_F145A_I223P or SpyL32P and Im7(7-45)
6
7 # FKBP25_F145A_I223P searches:
8 # >FKBP25_F145A_I223P
9 # MRGSHHHHHGLVPRGSMGPPKYTKSVLKKGDKTNFPKKGDDVHCWYTGTLQDGTVDNINQTSAKKKKNAKPLSFKVGVGKVIKRGWDEALLTMSKGEKARLEIEPEWAYGKKKQPDAKIPPNAKLTFFVELVDPD
10 # >decoy_FKBP25_F145A_I223P
11 # DPDVLEVEFTLKNPPIKADPQGGKYAWPEIELRRAKEGKSMTLAEDWGRIVKGVGVKFSLPKANKKKKASTQINTDAVTDGDLTGTWCHVVDGKKPFNTKDGKLVSKTYKPPGMSGRPVLGHHHHHSGRM
12 # >SpyL32P
13 # SADITTAAPADAKPMHHHKGKFGPHQDMMFDPNLTDAQKQIREIMKGQRDQMKRPPLEERRAMHDIASDTFDKVKAEAQIAKMEEQRKANMLAHMETQNKIYNILTPEQKKQFNANFEKRLTERPAAKGKMPATAE
14 # >Im7_7-45
15 # SISDYTEAEFVQLLKEIEKENVAATDDVLDVLLLEHFVKIT
16 # >decoy_SpyL32P
17 # EATAPMKGAAPRETLRKEFNANFQKKQEPILINIKNQTEMHALMNAKRQEEMKAIQAEAKVKDFDSAIIDHMARREELPPRKMQRQGMIERIQKQADTLNPKDFMMDQHPGFKGHHMMPKADAPAAITTDAS
18 # >decoy_Im7_7-45
19 # TIKVFHELLVLDVDDTAAVNEKEIEKLLQVFEAETYDSIS
20
21 export_percolator = 1
22 export_pepXML = 1
23 percolator_version = 3.0
24
25 enrichment = 0
26 instrument = 0
27 MS1_centroid = 0
28 MS2_centroid = 0
29 MS1_resolution = 60000
30 MS2_resolution = 30000
31
32 cross_link = nK nK 110.0362342 DSA_Light
33 mono_link = nK 128.0706042
34 mono_link = nK 129.0546242
35 cross_link = nK nK 116.0563632 DSA_Heavy
36 mono_link = nK 134.0907332
37 mono_link = nK 135.0747532
38
39 diff_mods_on_xl = 1
40 max_mods_per_peptide = #1 for FKBP25_F145A_I223P 3 for SpyL32P
41 mono_links_on_xl = #0 for FKBP25_F145A_I223P 1 for SpyL32P
42 modification = M 15.9949
43
44 enzyme = [KR]|{P}
45
46 fragment_bin_offset = 0.0
47 fragment_bin_size = 0.03
48 ion_series_A = 0
49 ion_series_B = 1
50 ion_series_C = 0
51 ion_series_X = 0
52 ion_series_Y = 1
53 ion_series_Z = 0
54
55 decoy_filter = decoy
56 isotope_error = 1
57 max_misceavages = #5 for FKBP25_F145A_I223P 2 for SpyL32P
58 max_peptide_mass = #6000.0 for FKBP25_F145A_I223P 8000.0 for SpyL32P
59 min_peptide_mass = 400.0
60 max_spectrum_peaks = 0
61 ppm_tolerance_pre = #6.0 for FKBP25_F145A_I223P 10.0 for SpyL32P
62 prefer_precursor_pred = 2
63 spectrum_processing = 0
64 top_count = 300
65
66 truncate_prot_names = 0
67 turbo_button = 1
```
